# Supplementary material for: Assessment of Photoperiod Sensitivity and the Effect of Sowing Date on Dry-Season Sorghum Cultivars in Southern Chad
Source: MDPI journal article supplement (doi:10.3390/agronomy13030932), 2023-03-21
Supplement: s1 [file s1]

**Table S1.** Cultivars number and name, region and village of origin, rainfall (mm/10 years), and potential yield (PY; tons/ha) of Chadian dry-season sorghum sown early (S1) and late (S2) at the Youé research farms, Chad, in 2013 and 2014.

| Cv # | Region | Village   | Name                  | Rainfall <sup>†</sup> | 2013 Potential Yield<br>(tons/ha) |       |         | 2014 Potential Yield<br>(tons/ha) |       |         |
|------|--------|-----------|-----------------------|-----------------------|-----------------------------------|-------|---------|-----------------------------------|-------|---------|
|      |        |           |                       |                       | PY-S1                             | PY-S2 | average | PY-S1                             | PY-S2 | average |
| 1    | TJ     | Doumouguo | Maïdekomi             | 1081                  | 0.68                              | 0.40  | 0.54    | 0.32                              | 0.38  | 0.35    |
| 2    | TJ     | Doumouguo | Farine Kouamgue       | 1081                  | 1.28                              | 1.02  | 1.15    | 1.26                              | 0.70  | 0.98    |
| 3    | TJ     | Doumouguo | Wakba                 | 1081                  | 0.90                              | 0.98  | 0.94    | 0.82                              | 0.62  | 0.72    |
| 4    | TJ     | Doumouguo | <sup>‡</sup> Farine   | 1081                  | 1.40                              | 1.45  | 1.43    | 1.68                              | 0.90  | 1.29    |
| 5    | TJ     | Doumouguo | Beurdague             | 1081                  | 1.08                              | 0.68  | 0.88    | 0.54                              | 0.44  | 0.49    |
| 6    | TJ     | Doumouguo | Bouagué               | 1081                  | 0.85                              | 0.70  | 0.78    | 0.75                              | 0.52  | 0.64    |
| 8    | TJ     | Doumouguo | Toumon guessiri       | 1081                  | 0.75                              | 0.72  | 0.74    | 0.68                              | 0.40  | 0.54    |
| 9    | TJ     | Tchaguine | Farine (gournagourna) | 1081                  | 0.68                              | 0.70  | 0.69    | 0.56                              | 0.36  | 0.46    |
| 10   | TJ     | Tchaguine | Gogoum jaune          | 1081                  | 0.38                              | 1.24  | 0.81    | 1.43                              | 0.88  | 1.15    |
| 11   | TJ     | Tchaguine | Bagouwaye élété       | 1081                  | 0.80                              | 0.76  | 0.78    | 0.62                              | 0.48  | 0.55    |
| 12   | TJ     | Tchaguine | Toukom -Toumon)       | 1081                  | 1.13                              | 0.66  | 0.89    | 1.04                              | 0.62  | 0.83    |

|    |     |             |                            |      |      |      |      |      |      |      |
|----|-----|-------------|----------------------------|------|------|------|------|------|------|------|
| 13 | TJ  | Tchaguine   | Secheresse                 | 1081 | 0.73 | 0.86 | 0.79 | 0.68 | 0.64 | 0.66 |
| 14 | TJ  | Tchaguine   | Toumon (Toukom)            | 1081 | 0.88 | 0.74 | 0.81 | 0.46 | 0.42 | 0.44 |
| 15 | TJ  | Tchaguine   | Dormi rouge                | 1081 | 0.65 | 0.80 | 0.73 | 0.46 | 0.43 | 0.44 |
| 16 | TJ  | Tchaguine   | $\Psi$ Gogmi (red flour)   | 1081 | 1.58 | 0.86 | 1.22 | 1.66 | 0.68 | 1.17 |
| 17 | TJ  | Tchaguine   | Farine blanc               | 1081 | 0.95 | 0.72 | 0.84 | 0.60 | 0.68 | 0.64 |
| 18 | TJ  | Tchaguine   | Secheresse blanc           | 1081 | 0.75 | 0.74 | 0.75 | 0.64 | 0.70 | 0.67 |
| 19 | TJ  | Tchaguine   | $\Psi$ Gogoumi(whiteflour) | 1081 | 1.40 | 1.22 | 1.31 | 1.52 | 0.52 | 1.02 |
| 20 | TJ  | Tchaguine   | Bagouwaye                  | 1081 | 0.90 | 0.34 | 0.62 | 0.74 | 0.12 | 0.43 |
| 21 | TJ  | Tchaguine   | Heda dallatcho             | 1081 | 1.00 | 0.76 | 0.88 | 0.53 | 0.52 | 0.52 |
| 22 | TJ  | Tchaguine   | Dormi                      | 1081 | 0.78 | 0.94 | 0.86 | 0.90 | 0.64 | 0.77 |
| 23 | MKE | Goulmourévé | Dinglenga                  | 967  | 0.75 | 0.82 | 0.79 | 0.88 | 0.88 | 0.88 |
| 24 | MKE | Goulmourévé | Tchokowawana               | 967  | 1.13 | 0.88 | 1.00 | 1.20 | 0.68 | 0.94 |
| 25 | MKE | Goulmourévé | Safrana Madawaïna          | 967  | 0.73 | 0.78 | 0.75 | 0.86 | 0.40 | 0.63 |
| 26 | MKE | Goulmourévé | Bourbourina                | 967  | 0.70 | 0.94 | 0.82 | 1.08 | 0.92 | 1.00 |
| 27 | MKE | Goulmourévé | Bourbourina 2              | 967  | 0.63 | 0.90 | 0.76 | 0.58 | 0.62 | 0.60 |
| 28 | MKE | Goulmourévé | Medjeriana                 | 967  | 0.68 | 0.74 | 0.71 | 0.70 | 0.64 | 0.67 |

|    |     |             |                              |      |      |      |      |      |      |      |
|----|-----|-------------|------------------------------|------|------|------|------|------|------|------|
| 29 | MKE | Goulmourévé | Ndjamena 2                   | 967  | 0.75 | 0.80 | 0.78 | 0.53 | 0.52 | 0.52 |
| 30 | MKE | Goulmourévé | Safradjou gomna              | 967  | 1.35 | 0.76 | 1.06 | 1.04 | 0.80 | 0.92 |
| 31 | MKE | Goulmourévé | Djogomna                     | 967  | 1.00 | 1.22 | 1.11 | 0.92 | 1.00 | 0.96 |
| 32 | MKE | Goulmourévé | Ndjamena                     | 967  | 0.75 | 0.76 | 0.76 | 0.72 | 0.64 | 0.68 |
| 33 | MKE | Youé-ferme  | Babou rouge                  | 892  | 1.00 | 0.62 | 0.81 | 0.80 | 0.58 | 0.69 |
| 34 | MKE | Youé-ferme  | Mindeurie                    | 892  | 0.63 | 0.70 | 0.66 | 0.78 | 0.60 | 0.69 |
| 35 | MKE | Youé-ferme  | Babou blanc                  | 892  | 0.90 | 0.82 | 0.86 | 0.56 | 0.88 | 0.72 |
| 36 | MKE | Youé-ferme  | <sup>ψ</sup> Glinding        | 892  | 1.50 | 0.92 | 1.21 | 1.48 | 0.86 | 1.17 |
| 37 | MKE | Youé-ferme  | Tchorolalé                   | 892  | 0.85 | 1.04 | 0.95 | 1.04 | 0.94 | 0.99 |
| 38 | MKE | Youé-ferme  | Donglon                      | 892  | 1.35 | 0.72 | 1.04 | 0.94 | 0.80 | 0.87 |
| 39 | MKE | Youé-ferme  | <sup>ψ</sup> Donglon rouge   | 892  | 1.58 | 0.80 | 1.19 | 1.38 | 0.62 | 1.00 |
| 40 | MKE | Youé-ferme  | Manbalam                     | 892  | 1.03 | 0.96 | 0.99 | 0.76 | 0.82 | 0.79 |
| 41 | MKW | Margalao    | Vounging a 2 grains          | 1118 | 1.25 | 0.84 | 1.05 | 0.56 | 1.02 | 0.79 |
| 42 | MKW | Margalao    | Sorgho                       | 1118 | 0.93 | 0.92 | 0.92 | 0.74 | 0.98 | 0.86 |
| 43 | MKW | Margalao    | Donglo Bando                 | 1118 | 1.35 | 1.32 | 1.34 | 0.62 | 0.98 | 0.80 |
| 44 | MKW | Margalao    | <sup>ψ</sup> Vounging Membou | 1118 | 1.15 | 0.88 | 1.02 | 1.20 | 1.04 | 1.12 |

|             |     |          |                      |      |              |              |              |              |              |              |
|-------------|-----|----------|----------------------|------|--------------|--------------|--------------|--------------|--------------|--------------|
| 45          | MKW | Margalao | Bambou mbou          | 1118 | 0.70         | 0.84         | 0.77         | 0.98         | 0.70         | 0.84         |
| 47          | MKW | Margalao | Sorgho (sans nom)    | 1118 | 1.40         | 1.10         | 1.25         | 0.88         | 0.94         | 0.91         |
| 48          | MKW | Margalao | Zabili               | 1118 | 1.53         | 1.50         | 1.51         | 1.06         | 0.88         | 0.97         |
| 51          | MKW | Biparé   | <sup>‡</sup> Dalassi | 1011 | 1.08         | 0.98         | 1.03         | 1.36         | 0.98         | 1.17         |
| 53          | MKW | Biparé   | Maï Mamou            | 1011 | 0.40         | 0.15         | 0.28         | 0.52         | 0.46         | 0.49         |
| 55          | MKW | Biparé   | Naparo               | 1011 | 0.63         | 0.62         | 0.62         | 0.74         | 0.36         | 0.55         |
| Min. value  |     |          |                      |      | 0.28         | 0.15         | 0.21         | 0.32         | 0.12         | 0.22         |
| Max. value  |     |          |                      |      | 1.58         | 1.50         | 1.54         | 1.68         | 1.12         | 1.40         |
| <i>Mean</i> |     |          |                      |      | <i>0.94</i>  | <i>0.83</i>  | <i>0.88</i>  | <i>0.86</i>  | <i>0.69</i>  | <i>0.78</i>  |
| <i>CV</i>   |     |          |                      |      | <i>33.95</i> | <i>30.20</i> | <i>32.08</i> | <i>38.57</i> | <i>32.24</i> | <i>35.40</i> |

<sup>‡</sup>Annual rainfall over 10 consecutive years. <sup>‡</sup>Ecotypes with potentials yields (PY) greater than regional average (1.0 ton/ha at 14% moisture content), irrespective of year and sowing date (S1; early & S2; late).
